# Supplementary material
Source: PubMed Central journal article supplement (PMC6476415)
Supplement: cwz015_supplementary_material_.pdf [file cwz015_supplementary_material_.pdf]

**Supplementary Material of**

**Structure of the zebrafish galectin-1-L2 and model of its interaction with the infectious hematopoietic necrosis virus (IHNV) envelope glycoprotein**

Anita Ghosh<sup>1,£</sup>, Aditi Banerjee<sup>3,¥</sup>, L. Mario Amzel<sup>2</sup>, Gerardo R. Vasta<sup>3</sup>, and

Mario A. Bianchet<sup>1,2,\*</sup>

<sup>1</sup>Department of Neurology and <sup>2</sup>Structural Enzymology and Thermodynamics Group of the Department of Biophysics and Biophysical Chemistry, Johns Hopkins University School of Medicine, Baltimore, MD 21205.

<sup>3</sup>Department of Microbiology and Immunology, University of Maryland School of Medicine, Institute of Marine and Environmental Technology, Baltimore, MD 21202

<sup>£</sup>Current address: Department of Physiology and Biophysics, Boston University School of Medicine, 700 Albany Street, W408C, Boston, MA 02118

<sup>¥</sup> Current address: Department of Pediatrics, University of Maryland School of Medicine, Baltimore, MD 21201

\*To whom correspondence should be addressed: Mario A. Bianchet, Departments of Neurology and Biophysics and Biophysical Chemistry, Johns Hopkins University School of Medicine, 725 N. Wolfe St., Baltimore, MD 21205, USA, Tel.: (410) 614-8221; E-mail: [bianchet@jhmi.edu](mailto:bianchet@jhmi.edu)

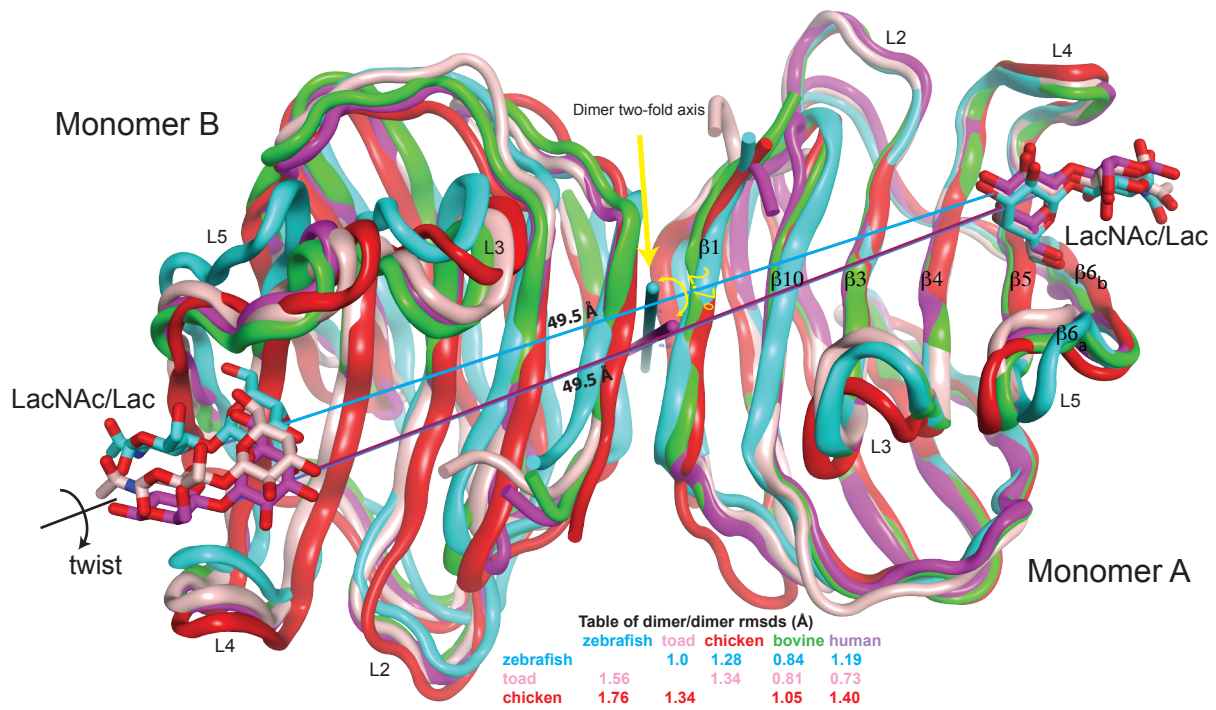

Table of dimer/dimer rmsds (Å)

|           | zebrafish | toad | chicken | bovine | human |
|-----------|-----------|------|---------|--------|-------|
| zebrafish |           | 1.0  | 1.28    | 0.84   | 1.19  |
| toad      | 1.56      |      | 1.34    | 0.81   | 0.73  |
| chicken   | 1.76      | 1.34 |         | 1.05   | 1.40  |
| bovine    | 2.42      | 0.96 | 1.56    |        |       |
| human     | 1.92      | 0.80 | 1.43    | 0.91   |       |

**Supplementary Figure S1.** Overlay of zebrafish and known galectins-1. Toad (pink), bovine (green), and human (purple) galectins-1 dimers were aligned to Drgal1-L2 (orange), using only subunits A for the superposition. Drgal1-L2 dimer shows the smaller twist angle compared to the other galectin dimers, that cluster together. The table in the figure shows the rmsd for the pairwise alignment between dimers. The number of aligned C $\alpha$ -atoms ranges from 263 to 265. The green lines connect LacNAc glycosylic-bond oxygen atoms in human and zebrafish galectins-1 of different monomers showing that the same distance between disaccharides (4.95 nm).

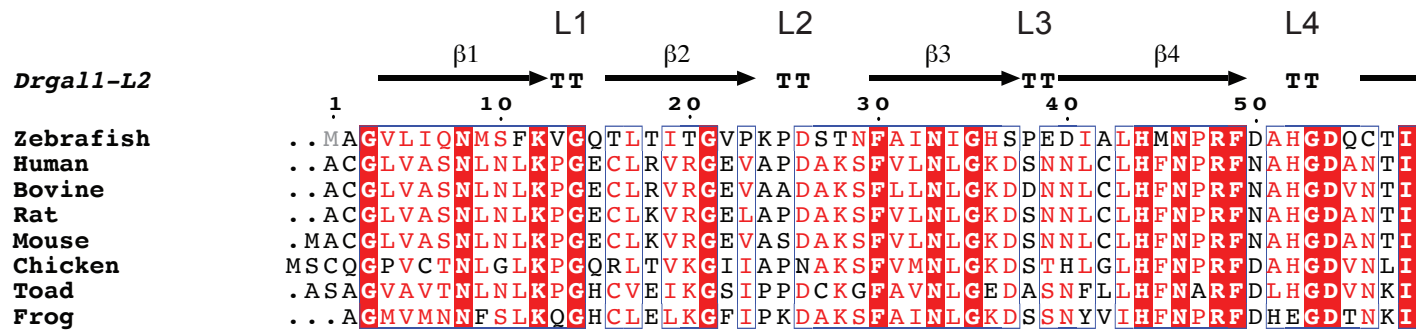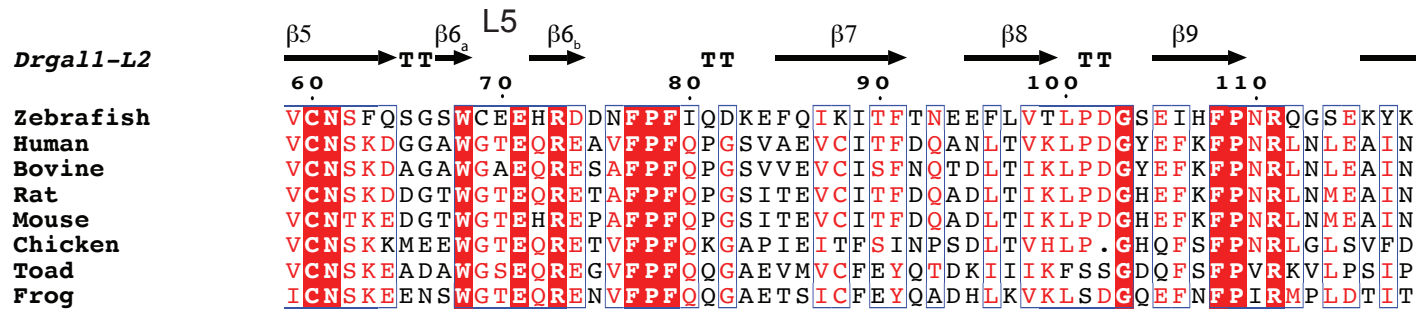

Percentage of identity (%)

*Drgal1-L2*

120 130

|           | Zebrafish | Human | Bovine | Rat  | Mouse | Chicken | Toad | Frog |
|-----------|-----------|-------|--------|------|-------|---------|------|------|
| Zebrafish | 100       | 40.2  | 37.1   | 38.6 | 37.8  | 34.8    | 32.1 | 34.8 |
| Human     | 40.2      | 100   | 86.6   | 90.3 | 87.4  | 55.6    | 45.5 | 49.2 |
| Bovine    | 37.1      | 86.6  | 100    | 85.1 | 83.0  | 54.8    | 48.5 | 47.0 |
| Rat       | 39.4      | 90.3  | 85.1   | 100  | 94.8  | 56.3    | 44.0 | 47.7 |
| Mouse     | 38.6      | 88.1  | 83.6   | 95.5 | 100   | 53.3    | 42.5 | 47.0 |
| Chicken   | 35.6      | 56.0  | 55.2   | 56.7 | 53.3  | 100     | 44.8 | 47.0 |
| Toad      | 32.6      | 45.5  | 48.5   | 44.0 | 42.2  | 44.4    | 100  | 56.8 |
| Frog      | 34.8      | 48.5  | 46.3   | 47.0 | 45.9  | 45.9    | 56.0 | 100  |



**Supplementary Figure S2.** Sequence alignment among structurally characterized galectins-1.

In the table the value at row i, column j equals to the number of residue matches between sequences i and j, divided by the length of sequence j. human galectin-1: 1GZW (Lopez-Lucendo, et al. 2004), *Rattus norvegicus* (rat) galectin-1: 3M2M (Salomonsson, et al. 2010), *Mus musculus* (mouse) galectin-1: 4LBQ (**DOI:** 10.2210/pdb4LBQ/pdb), *Gallus gallus* (chicken) galectin-1: 3DUJ (López-Lucendo, et al. 2009), and *Bufo Arenarum* (toad) galectin-1: 1GAN (Bianchet, et al. 2000).

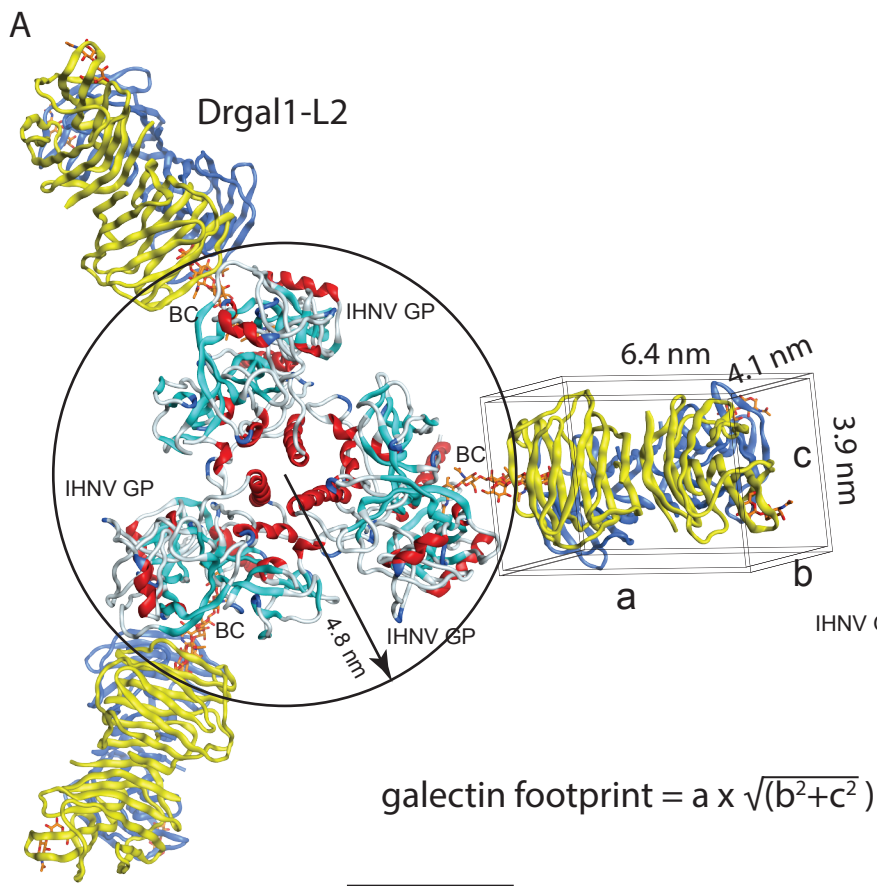

$$A_{(\text{Drgal1})} = 6.2 \times \sqrt{(3.9^2+4.1^2)} = 35.1 \text{ nm}^2$$

$$A_{(1 \text{ trimer} + 3 \text{ Drgal1})} = A_{(\text{trimer})} + 3 \times A_{(\text{Drgal1-L2})}$$

$$= 29.5 + 3 \times 35.1 = 134.5 \text{ nm}^2$$

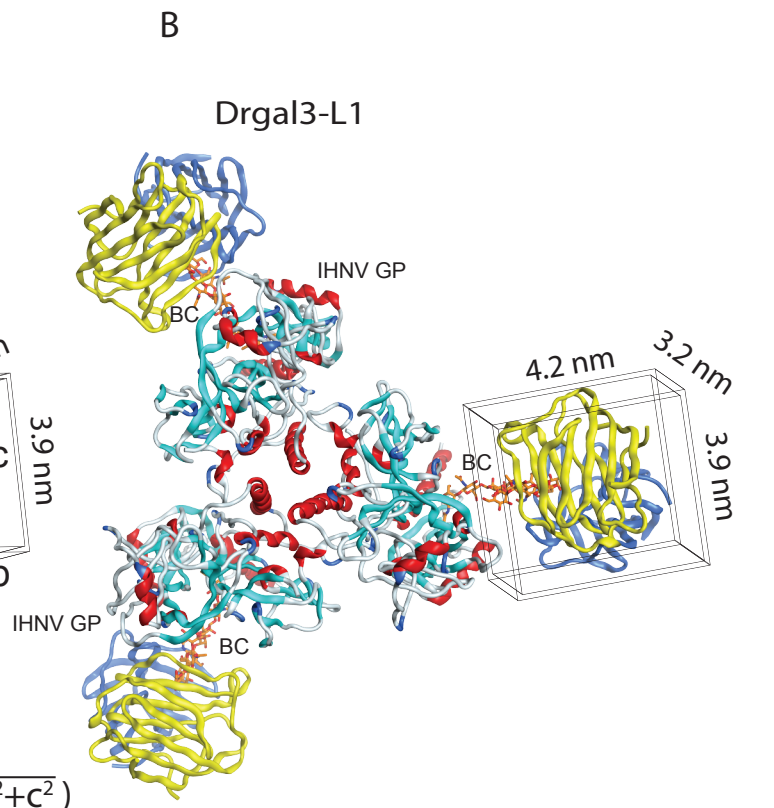

$$4.2 \times \sqrt{(3.2^2+3.9^2)} = 20.5 \text{ nm}^2$$

$$A_{(1 \text{ trimer} + 3 \text{ Drgal3-L1})} = A_{(\text{trimer})} + 3 \times A_{(\text{Drgal3-L1})}$$

$$= 29.5 + 3 \times 20.5 = 91 \text{ nm}^2$$

**Supplementary Figure S3. Area calculations.** GP trimer (cyan) fully decorated by two Drgal1-L2s (yellow and blue) showing the dimensions used for the area calculations. A Drgal1-L2 dimer is contained in a  $4.1 \times 3.8 \times 6.2 \text{ nm}^3$  rectangular box scribing galectin. A Drgal3-L1 in a  $3.2 \times 4.2 \times 3.95 \text{ nm}^3$  rectangular box scribing the galectin. The maximum footprint area is the area of the bisecting plane of the rectangular box  $35.1 \text{ nm}^2$  for Drgal1-L2 and  $20.5 \text{ nm}^2$  for Drgal3-L1. A fully decorated trimer will have an area of  $134 \text{ nm}^2$  for Drgal1-L2 and  $90.1 \text{ nm}^2$  for Drgal3-L1. Each trimer is circumscribed by a circle of  $r \approx 8.25 \text{ nm}$   $\sqrt{3} = 14.3 \text{ nm}$ .

**A**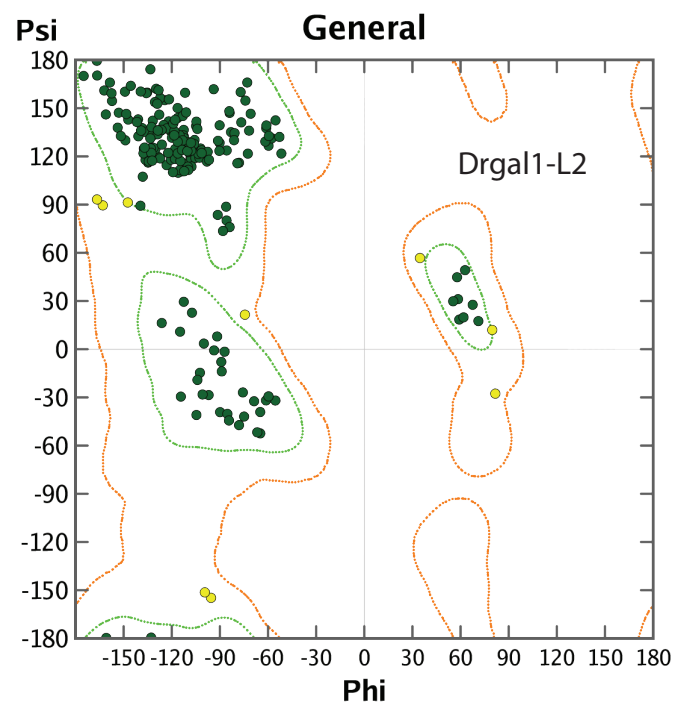**B**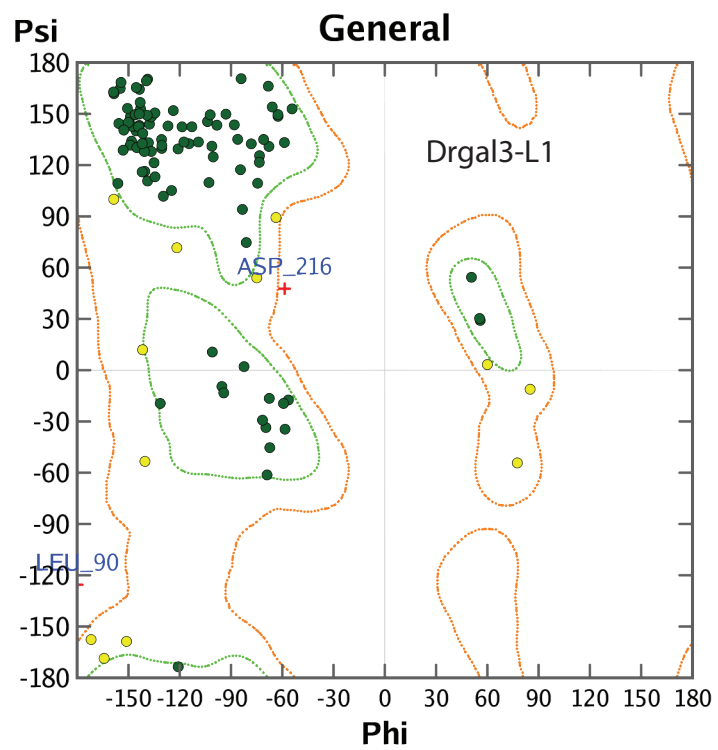**C**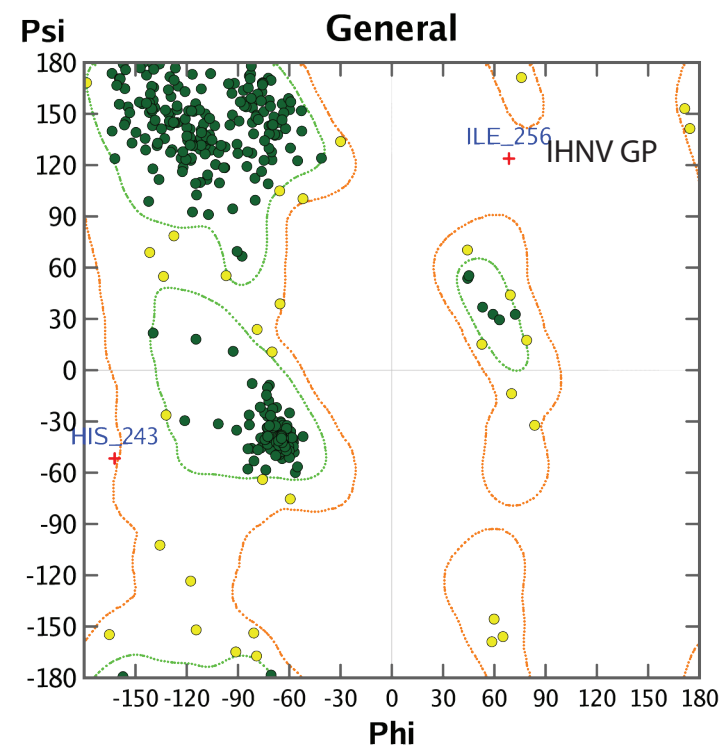

**Supplementary Figure S4.** *Ramachandran plots.* (A) Drgal1-L2, (B) Drgal3-L1, and (C) IHNV GP models



```

a = MyModel(env,
             alnfile = 'modelgp.ali', # alignment filename
             knowns = '5I2S',       # codes of the templates
             sequence = 'INHVGP')
# code of the target
a.starting_model= 4           # index of the first modela
a.ending_model = 4           # index of the last model
a.make()                      # do the actual homology modelling
sele=selection(a)
a.restraints.make(sele,restraint_type='stereo',spline_on_site=False)
cg=conjugate_gradients(output='REPORT')
md=molecular_dynamics(md_return='FINAL')
for method in (cg,md,cg):
    method.optimize(sele,max_iterations=2000)
a.write(file='INHGP.pdb')
# End of python script save in a file call model.py then run %python modeller.py
++++ cut line above

```

2) Alignment to input to Modeller. Save as 'modelgp.ali', and add the template 5I2S.pdb in the same directory in where you run modeller.py

++++Cut here

>P1;5I2S\_X

structureX:5I2S:1 : A : 422 : A : : ::

```

KFTIVFPHN-QKGNWKNVPSNYHYCPSS-SDLNWHNDLIGTALQ-VKMPKSHKAIQADGW
MCHASKWVTTCDFRWYGPKYITHSIRSFTPSVEQCKESIEQTKQGTWLNPGFPPQSCG-Y
ATVTDAEAVIVQVTPHHVLVDEYTGGEWVDSQFINGKCSNYICPTVHNSTT-WHSDYKVKG
LCDSNLISMDITFFSEDGELSSLGKEGTGFRSNYFAYETGGKACKMQYC-KHWGVRLPSG
VWFEMADKDLFAAARFPECPEGSSISAPSQTSVDVSLIQDVERILDYSLCQETWSKIRAG
LPISPVDSL SYLAPKNPGTGPAFTIINGTLKYFETRYIRVDIAAPILSRMVGMI SGT TTER
-ELWDDWAPYEDVEIGPNGVLR TSSGYKFPLYMIGHGMLDSDLHLSSKAQVFEHPHIQDA
IRKLDSFDL*

```

>P1; INHVGP

sequence: INHGP:38 : : 455 : : : : :

```

NPLFTYPEGCTLDKLSKVNASQLRCPRIFDDENRGLIAYPTSIRSLSVGNLGEIHTQGN
HIHKVLYRTICSTGFFGGQTIEKALVEMKLSSTKEAGAYDTTTAAALY----FPAPRCQWY
TDNVQNDLIFYYTQKSVLRDPYTRDFLSDSFIGGKCTKSPCQT-HWSNVVWMDAGIP-
ACDSSQEIKAHLFVDK-----ISNRVVKATSYGHHPWGLHRACMIEFCGKQW-IRTDLG

```

DLISVEYNSGAEILSFPKCEDKTMGMRGNLDDFAY-LDDLVKASESREECLEAHAEIIST  
NSVTPYLLSKFRSPHPGINDVYAMHKGSIYHGMCMTVAVDEVSKDRTTYRAHRATSFTKW  
ERPFGDEWEGFHGLHGNTTIIIPDLEKYVAQYKTS--SMMMMEPMSIK-SV-PHPSILAF  
YNETDLSGIS-----IRKLDSFDL\*

+++Cut here



## Supplementary Files

Models coordinates in a PDB format:

**File 1:** Model of Drgal3-L1/LacNAc complex.

Drgal3Model.pdb

**File 2:** Model of glycosylated IHNV GP.

IHNVGPMModel.pdb

**File 3:** Model IHNV GP fully decorated by Drgal1-L2.

INHVGP\_trimer\_decorated\_with\_Drgal1-L2.pdb

**File 4:** Model IHNV GP fully decorated by Drgal3-L1.

INHVGP\_trimer\_decorated\_with\_Drgal3-L1.pdb
